# Supplementary material
Source: Springer Nature journal article supplement (https://www.springermedizin.de/resource/supplementary/13002_2010_212_MOESM3_ESM.pdf/9627456)

## Diseases mentioned by participants treated with *sowa rigpa*

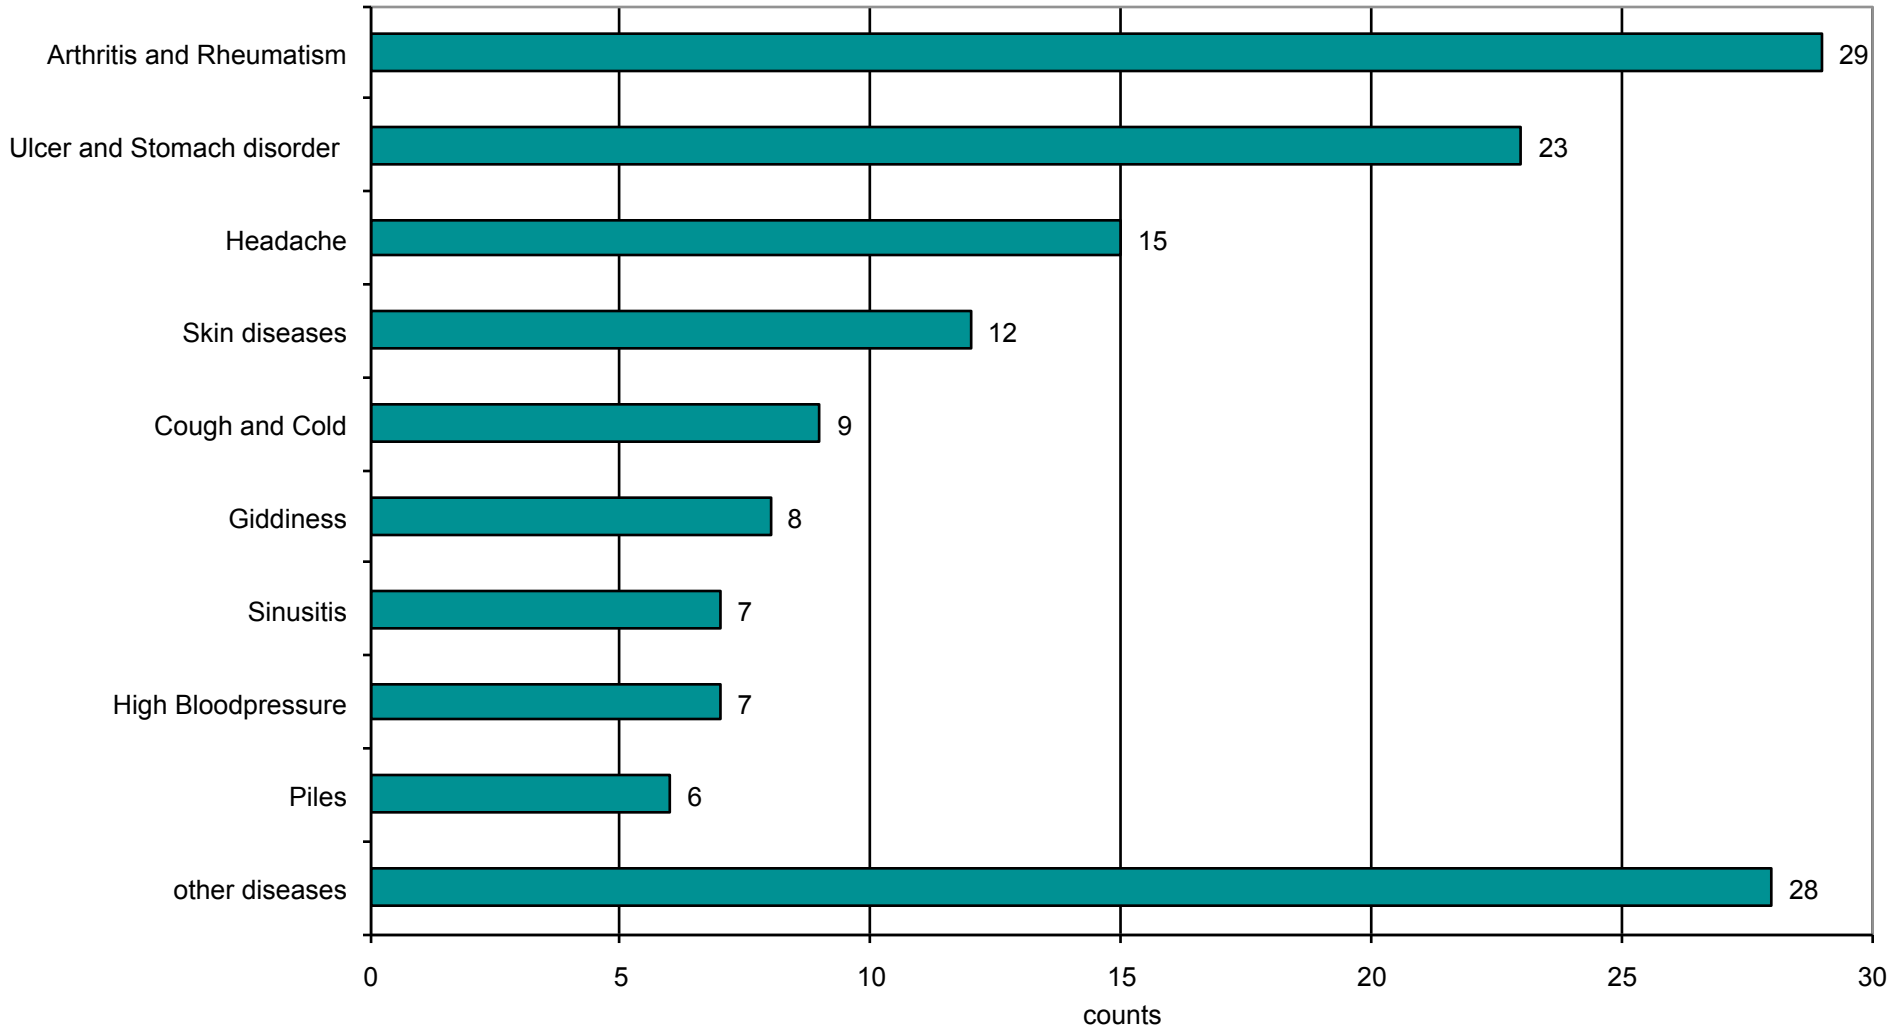

Supplement: MOESM3 [file 9627456]
